# Supplementary material for: Design and synthesis of hierarchical NiO/Ni3V2O8 nanoplatelet arrays with enhanced lithium storage properties
Source: Royal Society of Chemistry journal article supplement (doi:10.1039/c9ra08252b), 2019-01-01
Supplement: c9ra08252b1.pdf [file c9ra08252b1.pdf]

## Electronic Supplementary Information

### **Design and synthesis of hierarchical NiO/Ni<sub>3</sub>V<sub>2</sub>O<sub>8</sub> nanoplatelet arrays with enhanced lithium storage properties**

Yang Li<sup>\*a</sup>, Feng Duan<sup>a</sup>, Shuai Yang<sup>a</sup>, Qihuang Deng<sup>a</sup>, Songli Liu<sup>a</sup> and Cheng Peng<sup>a</sup>

*<sup>a</sup>College of Materials Science and Engineering, Yangtze Normal University, Chongqing, 408100, People's Republic of China*

*\* Corresponding author. Tel.: +86-023-72790029, Fax: +86-023-72790029*

*E-mail: yangli\_yznu@163.com;*

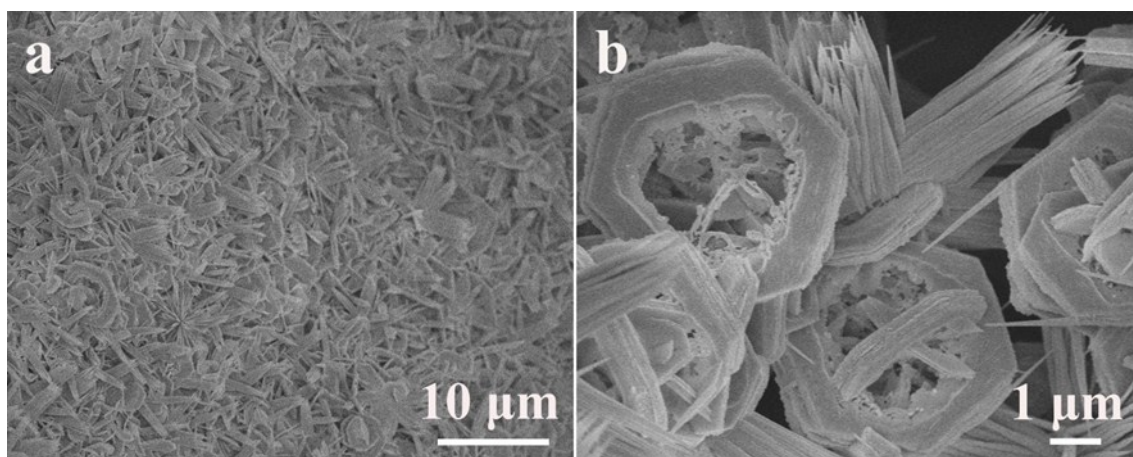

**Fig. S1** SEM pattern of NiO samples with low magnification.

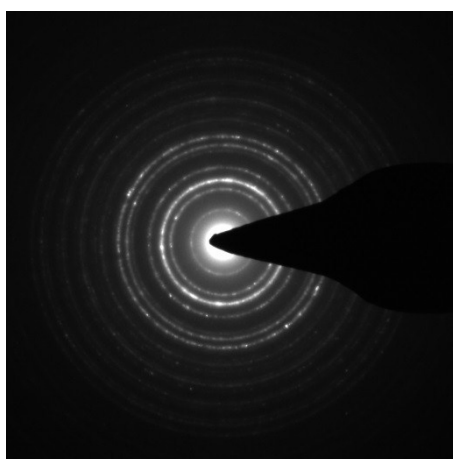

**Fig. S2** The SAED patterns of NiO/Ni<sub>3</sub>V<sub>2</sub>O<sub>8</sub> NPAs

**Table S1** Quantitative analysis of Ni and V contents of the samples by ICP-MS.

| Samples                                                             | Ni %  | V %   | Ni/V mole ratio |
|---------------------------------------------------------------------|-------|-------|-----------------|
| NiO/Ni <sub>3</sub> V <sub>2</sub> O <sub>8</sub><br>nanocomposites | 89.72 | 10.28 | 7.58:1          |

**Table S2** The comparison of the capacity retention of NiO/Ni<sub>3</sub>V<sub>2</sub>O<sub>8</sub> NPAs with the reported results.

| Nanomaterials | Current density<br>(mA g <sup>-1</sup> ) | Cycle<br>Number | Capacity<br>(mAh g <sup>-1</sup> ) | Reference |
|---------------|------------------------------------------|-----------------|------------------------------------|-----------|
|---------------|------------------------------------------|-----------------|------------------------------------|-----------|

|                                                                                                                   |     |     |        |           |
|-------------------------------------------------------------------------------------------------------------------|-----|-----|--------|-----------|
| NiO/Ni <sub>3</sub> V <sub>2</sub> O <sub>8</sub> NPAs                                                            | 100 | 100 | 1169.3 | This work |
| NiO-Co <sub>3</sub> O <sub>4</sub> nanoplate composite                                                            | 100 | 70  | 633    | [41]      |
| porous NiO-ZnO hybrid nanofibers                                                                                  | 200 | 120 | 949    | [42]      |
| Hierarchical Fe <sub>2</sub> O <sub>3</sub> @NiO<br>core/shell nanorod array                                      | 200 | 50  | 1047.2 | [50]      |
| Multilayer CuO@NiO Hollow<br>Spheres                                                                              | 100 | 200 | 1061   | [51]      |
| Hierarchical mesoporous hybrid<br>NiO-MnCo <sub>2</sub> O <sub>4</sub> microspheres                               | 200 | 50  | 846    | [37]      |
| Ni <sub>3</sub> V <sub>2</sub> O <sub>8</sub> amorphous wire<br>encapsulated in crystalline tube<br>nanostructure | 300 | 300 | 962    | [32]      |

**Table S3** Impedance parameters calculated from equivalent circuit model.

|                     | NiO<br>(Fresh samples) | NiO/Ni <sub>3</sub> V <sub>2</sub> O <sub>8</sub><br>(Fresh samples) | NiO/Ni <sub>3</sub> V <sub>2</sub> O <sub>8</sub><br>(3 <sup>rd</sup> ) | NiO/Ni <sub>3</sub> V <sub>2</sub> O <sub>8</sub><br>(100 <sup>th</sup> ) |
|---------------------|------------------------|----------------------------------------------------------------------|-------------------------------------------------------------------------|---------------------------------------------------------------------------|
| R <sub>s</sub> (Ω)  | 6.5                    | 5.1                                                                  | 8.1                                                                     | 13.8                                                                      |
| R <sub>ct</sub> (Ω) | 134.5                  | 61.5                                                                 | 42.7                                                                    | 11.6                                                                      |
| σ                   | 22.59                  | 16.82                                                                | 15.24                                                                   | 13.82                                                                     |
